# Supplementary material
Source: Research Square preprint supplement (doi:10.21203/rs.3.rs-8865851/v1)
Supplement: Supplementary file 1 [file 9bc91ea6f825ea6a49551a22.docx]

**SUPPLEMENTAL MATERIALS**

Appendix Table 1: Comparison of OLS-NW and PW methods

| **Feature** | **Newey–West (HAC)** | **Prais–Winsten (FGLS)** |
| --- | --- | --- |
| Primary purpose | Robust statistical inference after OLS | Efficient estimation and inference under modeled serial correlation |
| Treatment of coefficients | OLS coefficients retained | Coefficients transformed via FGLS |
| Assumed error structure | Arbitrary weak serial correlation and heteroskedasticity | First-order autoregressive errors (AR(1)) |
| Parametric assumptions on errors | None | AR(1) structure must be correctly specified |
| Robust to heteroskedasticity | Yes | No (unless additional corrections applied) |
| Robust to misspecification of serial correlation | Yes (within lag truncation) | No |
| Strict exogeneity required | Not required for validity of inference | Required for consistency |
| Efficiency | Less efficient than correctly specified FGLS | More efficient if AR(1) model is correct |
| Effect of serial correlation | Adjusts variance–covariance matrix only | Adjusts both coefficients and standard errors |
| Lag or correlation parameter | Lag truncation parameter | Autoregressive parameter |
| Typical standard errors | Often larger than conventional OLS SEs | Often smaller than OLS SEs when AR(1) holds |
| Asymptotic validity | Yes, under weak dependence | Yes, under correct AR(1) specification |
| Common use case in ITSA | Inference when dependence structure is unknown | Estimation when AR(1) assumption is credible |

Abbreviations: HAC, heteroskedasticity- and autocorrelation-consistent standard errors; FGLS, feasible generalized least squares regression; OLS, ordinary least squares regression; AR(1), first order autoregression; SE, standard errors; ITSA, interrupted time series analysis.

Appendix Figure 1: The impact of the number of control units and the number of time periods on percentage bias for a difference in differences in trend for OLS-NW (Panels A-C) and PW (Panels D-F) models. Panels **A** and **D** represent a 25% effect, panels **B** and **E** represent a 50% effect, and panel **C** and **F** represent a 100% effect.

Appendix Figure 2: The impact of the number of control units and the number of time periods on empirical standard errors for a difference in differences in trend for OLS-NW (Panels A-C) and PW (Panels D-F) models. Panels **A** and **D** represent a 25% effect, panels **B** and **E** represent a 50% effect, and panel **C** and **F** represent a 100% effect.

Appendix Figure 3: The impact of the number of control units and the number of time periods on root mean squared error for a difference in differences in trend for OLS-NW (Panels A-C) and PW (Panels D-F) models. Panels **A** and **D** represent a 25% effect, panels **B** and **E** represent a 50% effect, and panel **C** and **F** represent a 100% effect.

Appendix Figure 4: The impact of the number of control units and the number of time periods on 95% coverage for a difference in differences in trend for OLS-NW (Panels A-C) and PW (Panels D-F) models. Panels **A** and **D** represent a 25% effect, panels **B** and **E** represent a 50% effect, and panel **C** and **F** represent a 100% effect.

Appendix Figure 5: The impact of the number of control units and the number of time periods on percentage bias for a difference in differences in level for OLS-NW (Panels A-C) and PW (Panels D-F) models. Panels **A** and **D** represent a 20% effect, panels **B** and **E** represent a 25% effect, and panel **C** and **F** represent a 30% effect.

Appendix Figure 6: The impact of the number of control units and the number of time periods on empirical standard errors for a difference in differences in level for OLS-NW (Panels A-C) and PW (Panels D-F) models. Panels **A** and **D** represent a 20% effect, panels **B** and **E** represent a 25% effect, and panel **C** and **F** represent a 30% effect.

Appendix Figure 7: The impact of the number of control units and the number of time periods on root mean squared error for a difference in differences in level for OLS-NW (Panels A-C) and PW (Panels D-F) models. Panels **A** and **D** represent a 20% effect, panels **B** and **E** represent a 25% effect, and panel **C** and **F** represent a 30% effect.

Appendix Figure 8: The impact of the number of control units and the number of time periods on 95% coverage for a difference in differences in level for OLS-NW (Panels A-C) and PW (Panels D-F) models. Panels **A** and **D** represent a 20% effect, panels **B** and **E** represent a 25% effect, and panel **C** and **F** represent a 30% effect.

Appendix Figure 9: The impact of the number of time periods on type I error rates for OLS-NW and PW models.

Appendix Figure 10: The impact of autocorrelation on type I error rates for OLS-NW and PW models.

Appendix Figure 11: Sensitivity analysis 1. The impact of having a different pre-treatment trend (controls = 1, treatment unit = 5) and the number of time periods, on power for OLS-NW and PW models.

Appendix Figure 12: Sensitivity analysis 2. The impact of having a different pre-treatment level (controls = 8, treatment unit = 10) and the number of time periods, on power for OLS-NW and PW models.

Appendix Figure 13: Sensitivity analysis 3. The impact of having a different pre-treatment level (controls = 8, treatment unit = 10), and both a level and trend change in the treatment unit (level change = 20% increase; trend change = 100%) and the number of time periods, on power for OLS-NW and PW models.

**Stata Code for POWER_ITSA Used in this Paper**

***********************************************************************

**** trend *****

***********************************************************************

********************************

***** OLS with NW std errs ****

*******************************

set scheme stmono2

* pre-to-post trend change (25% 50% 100% increase); 10-50 time periods; 4-20 controls; 1 sd for white noise

power multi_itsa, n(10(5)50) contcnt(4(4)20) tint(10) cint(10) tpre(1) cpre(1) tstep(0) cstep(0) tsd(1) csd(1) cpost(1) tpost(1.25 1.50 2) tacorr(.20) cacorr(.20) reps(2000) ///

noi table ///seed(1234)

mat effect = r(pss_table)

svmat effect

rename effect1 alpha

rename effect2 power

rename effect3 period

rename effect4 controls

rename effect5 trper

rename effect6 tint

rename effect7 tpre

rename effect8 tpost

rename effect9 tstep

rename effect10 tcorr

rename effect11 cint

rename effect12 cpre

rename effect13 cpost

rename effect14 cstep

rename effect15 ccorr

rename effect16 reps

rename effect17 bias

rename effect18 rmse

rename effect19 coverage

rename effect20 se

save "C:\Users\Ariel\Desktop\ITSA_stuff\compare models\trend_nw.dta", replace

***** produce graphs *****

use "C:\Users\Ariel\Desktop\ITSA_stuff\compare models\trend_nw.dta", replace

***** produce graphs *****

**** repeat this for each post-trend (25%, 50%, 100%)

local tpost = 1.25

local title (A)

set scheme stmono2

levelsof controls, local(levels)

* detect var type

local vartype : type controls

local plots ""

local legendopts "title(Controls, size(medium))"

local i = 1

local m "O diamond S T X" // marker symbols to cycle through

foreach l of local levels {

local msym : word `i' of `m'

if strpos("`vartype'","str") {

* controls is string -> use quotes

local plots `plots' (connected power period if controls=="`l'" & tpost==`tpost', sort msymbol(`msym') title("`title'"))

}

else {

* controls is numeric -> no quotes

local plots `plots' (connected power period if controls==`l' & tpost==`tpost', sort msymbol(`msym') title("`title'"))

}

local legendopts `legendopts' label(`i' "`l'")

local ++i

}

twoway `plots', ///

ytitle("Power (1-{&beta})") ylabel(.2(.2)1) ///

xtitle("Periods") ///

legend(`legendopts' size(medium))

graph save "Graph" "C:\Users\Ariel\Desktop\ITSA_stuff\compare models\trend_nw_.25_graph.gph"

*************************

*** autocorrelation *****

*************************

set scheme stmono2

forvalues ac = -0.9(0.3)0.9 {

power multi_itsa, n(10(5)50) contcnt(12) ///

tint(10) cint(10) tpre(1) cpre(1) ///

tstep(0) cstep(0) tsd(1) csd(1) ///

cpost(1) tpost(1.25 1.50 2) ///

tacorr(`ac') cacorr(`ac') alpha(0.05) reps(2000) ///

noi table ///seed(1234)

mat effect = nullmat(effect) \ r(pss_table)

}

svmat effect

rename effect1 alpha

rename effect2 power

rename effect3 period

rename effect4 controls

rename effect5 trper

rename effect6 tint

rename effect7 tpre

rename effect8 tpost

rename effect9 tstep

rename effect10 tcorr

rename effect11 cint

rename effect12 cpre

rename effect13 cpost

rename effect14 cstep

rename effect15 ccorr

rename effect16 reps

rename effect17 bias

rename effect18 rmse

rename effect19 coverage

rename effect20 se

save "C:\Users\Ariel\Desktop\ITSA_stuff\compare models\trend_nw_ac.dta"

*** graph it ***

use "C:\Users\Ariel\Desktop\ITSA_stuff\compare models\trend_nw_ac.dta", replace

tempvar test

gen str4 `test' = string(tcorr, "%4.1f")

local tpost 2

local title (C)

set scheme stmono2

twoway ///

(connected power period if `test' == "-0.9" & tpost == `tpost', sort) ///

(connected power period if `test' == "-0.6" & tpost == `tpost', sort) ///

(connected power period if `test' == "-0.3" & tpost == `tpost', sort) ///

(connected power period if `test' == "0.0" & tpost == `tpost', sort) ///

(connected power period if `test' == "0.3" & tpost == `tpost', sort) ///

(connected power period if `test' == "0.6" & tpost == `tpost', sort) ///

(connected power period if `test' == "0.9" & tpost == `tpost', sort), ///

legend(order(1 "-0.9" 2 "-0.6" 3 "-0.3" 4 "0" 5 "0.3" 6 "0.6" 7 "0.9") ///

title("Autocorr", size(medium))) ///

xtitle("Period") ///

ytitle("Power(1-{&beta})") ///

ylabel(.2(.2)1) ///

title("`title'")

graph save "Graph" "C:\Users\Ariel\Desktop\ITSA_stuff\compare models\trend_ac_nw_.25_graph.gph"

********************

*** graph bias *****

********************

use "C:\Users\Ariel\Desktop\ITSA_stuff\compare models\trend_nw.dta", clear

local tpost 1.25

local title (A)

set scheme stmono2

twoway ///

(connected bias period if controls == 4 & tpost == `tpost', sort) ///

(connected bias period if controls == 8 & tpost == `tpost', sort) ///

(connected bias period if controls == 12 & tpost == `tpost', sort) ///

(connected bias period if controls == 16 & tpost == `tpost', sort) ///

(connected bias period if controls == 20 & tpost == `tpost', sort), ///

legend(order(1 "4" 2 "8" 3 "12" 4 "16" 5 "20") ///

title("Controls", size(medium))) ///

xtitle("Period") ///

ytitle("% Bias") ///

ylabel(-10(2)10) ///

title("`title'")

graph save "Graph" "C:\Users\Ariel\Desktop\ITSA_stuff\compare models\trend_bias_nw_.25_graph.gph"

************************

*** graph std errs *****

************************

use "C:\Users\Ariel\Desktop\ITSA_stuff\compare models\trend_nw.dta", clear

local tpost 1.25

local title (A)

set scheme stmono2

twoway ///

(connected se period if controls == 4 & tpost == `tpost', sort) ///

(connected se period if controls == 8 & tpost == `tpost', sort) ///

(connected se period if controls == 12 & tpost == `tpost', sort) ///

(connected se period if controls == 16 & tpost == `tpost', sort) ///

(connected se period if controls == 20 & tpost == `tpost', sort), ///

legend(order(1 "4" 2 "8" 3 "12" 4 "16" 5 "20") ///

title("Controls", size(medium))) ///

xtitle("Period") ///

ytitle("Empirical Std Err.") ///

ylabel(0(.1).5) ///

title("`title'")

graph save "Graph" "C:\Users\Ariel\Desktop\ITSA_stuff\compare models\trend_se_nw_.25_graph.gph"

************************

*** graph RMSE *****

************************

use "C:\Users\Ariel\Desktop\ITSA_stuff\compare models\trend_nw.dta", clear

local tpost 1.25

local title (A)

set scheme stmono2

twoway ///

(connected rmse period if controls == 4 & tpost == `tpost', sort) ///

(connected rmse period if controls == 8 & tpost == `tpost', sort) ///

(connected rmse period if controls == 12 & tpost == `tpost', sort) ///

(connected rmse period if controls == 16 & tpost == `tpost', sort) ///

(connected rmse period if controls == 20 & tpost == `tpost', sort), ///

legend(order(1 "4" 2 "8" 3 "12" 4 "16" 5 "20") ///

title("Controls", size(medium))) ///

xtitle("Period") ///

ytitle("RMSE") ///

ylabel(0.90(.05)1.1) ///

title("`title'")

graph save "Graph" "C:\Users\Ariel\Desktop\ITSA_stuff\compare models\trend_rmse_nw_.25_graph.gph"

****************************

*** graph 95% coverage *****

****************************

use "C:\Users\Ariel\Desktop\ITSA_stuff\compare models\trend_nw.dta", clear

local tpost 1.25

local title (A)

set scheme stmono2

twoway ///

(connected coverage period if controls == 4 & tpost == `tpost', sort) ///

(connected coverage period if controls == 8 & tpost == `tpost', sort) ///

(connected coverage period if controls == 12 & tpost == `tpost', sort) ///

(connected coverage period if controls == 16 & tpost == `tpost', sort) ///

(connected coverage period if controls == 20 & tpost == `tpost', sort), ///

legend(order(1 "4" 2 "8" 3 "12" 4 "16" 5 "20") ///

title("Controls", size(medium))) ///

xtitle("Period") ///

ytitle("95% Coverage") ///

ylabel(0.60(.10)1) ///

title("`title'")

graph save "Graph" "C:\Users\Ariel\Desktop\ITSA_stuff\compare models\trend_cover_nw_.25_graph.gph"

**************************

***** Prais-Winsten *****

**************************

*****************

**** trend *****

****************

set scheme stmono2

* pre-to-post trend change (25% 50% 100% increase); 10-50 time periods; 4-20 controls; 1 sd for white noise

power multi_itsa, n(10(5)50) contcnt(4(4)20) tint(10) cint(10) tpre(1) cpre(1) tstep(0) cstep(0) tsd(1) csd(1) cpost(1) tpost(1.25 1.50 2) tacorr(.20) cacorr(.20) reps(2000) ///

noi table prais /// seed(1234)

mat effect = r(pss_table)

svmat effect

rename effect1 alpha

rename effect2 power

rename effect3 period

rename effect4 controls

rename effect5 trper

rename effect6 tint

rename effect7 tpre

rename effect8 tpost

rename effect9 tstep

rename effect10 tcorr

rename effect11 cint

rename effect12 cpre

rename effect13 cpost

rename effect14 cstep

rename effect15 ccorr

rename effect16 reps

rename effect17 bias

rename effect18 rmse

rename effect19 coverage

rename effect20 se

save "C:\Users\Ariel\Desktop\ITSA_stuff\compare models\trend_prais.dta", replace

***** produce graphs *****

use "C:\Users\Ariel\Desktop\ITSA_stuff\compare models\trend_prais.dta", replace

local tpost = 1.25

local title (D)

set scheme stmono2

levelsof controls, local(levels)

* detect var type

local vartype : type controls

local plots ""

local legendopts "title(Controls, size(medium))"

local i = 1

local m "O diamond S T X" // marker symbols to cycle through

foreach l of local levels {

local msym : word `i' of `m'

if strpos("`vartype'","str") {

* controls is string -> use quotes

local plots `plots' (connected power period if controls=="`l'" & tpost==`tpost', sort msymbol(`msym') title("`title'"))

}

else {

* controls is numeric -> no quotes

local plots `plots' (connected power period if controls==`l' & tpost==`tpost', sort msymbol(`msym') title("`title'"))

}

local legendopts `legendopts' label(`i' "`l'")

local ++i

}

twoway `plots', ///

ytitle("Power (1-{&beta})") ylabel(.2(.2)1) ///

xtitle("Number of periods") ///

legend(`legendopts' size(medium))

graph save "Graph" "C:\Users\Ariel\Desktop\ITSA_stuff\compare models\trend_prais_.25_graph.gph"

*************************

*** autocorrelation *****

*************************

set scheme stmono2

forvalues ac = -0.9(0.3)0.9 {

power multi_itsa, n(10(5)50) contcnt(12) ///

tint(10) cint(10) tpre(1) cpre(1) ///

tstep(0) cstep(0) tsd(1) csd(1) ///

cpost(1) tpost(1.25 1.50 2) ///

tacorr(`ac') cacorr(`ac') alpha(0.05) reps(2000) ///

noi table prais /// seed(1234)

mat effect = nullmat(effect) \ r(pss_table)

}

svmat effect

rename effect1 alpha

rename effect2 power

rename effect3 period

rename effect4 controls

rename effect5 trper

rename effect6 tint

rename effect7 tpre

rename effect8 tpost

rename effect9 tstep

rename effect10 tcorr

rename effect11 cint

rename effect12 cpre

rename effect13 cpost

rename effect14 cstep

rename effect15 ccorr

rename effect16 reps

rename effect17 bias

rename effect18 rmse

rename effect19 coverage

rename effect20 se

save "C:\Users\Ariel\Desktop\ITSA_stuff\compare models\trend_prais_ac.dta", replace

***********************

* graph autocorrelation

***********************

use "C:\Users\Ariel\Desktop\ITSA_stuff\compare models\trend_prais_ac.dta", replace

tempvar test

gen str4 `test' = string(tcorr, "%4.1f")

local tpost 2

local title (F)

set scheme stmono2

twoway ///

(connected power period if `test' == "-0.9" & tpost == `tpost', sort) ///

(connected power period if `test' == "-0.6" & tpost == `tpost', sort) ///

(connected power period if `test' == "-0.3" & tpost == `tpost', sort) ///

(connected power period if `test' == "0.0" & tpost == `tpost', sort) ///

(connected power period if `test' == "0.3" & tpost == `tpost', sort) ///

(connected power period if `test' == "0.6" & tpost == `tpost', sort) ///

(connected power period if `test' == "0.9" & tpost == `tpost', sort), ///

legend(order(1 "-0.9" 2 "-0.6" 3 "-0.3" 4 "0" 5 "0.3" 6 "0.6" 7 "0.9") ///

title("Autocorr", size(medium))) ///

xtitle("Period") ///

ytitle("Power(1-{&beta})") ///

ylabel(.2(.2)1) ///

title("`title'")

graph save "Graph" "C:\Users\Ariel\Desktop\ITSA_stuff\compare models\trend_ac_prais_.25_graph.gph", replace

********************

*** graph bias *****

********************

use "C:\Users\Ariel\Desktop\ITSA_stuff\compare models\trend_prais.dta", clear

local tpost 1.25

local title (A)

set scheme stmono2

twoway ///

(connected bias period if controls == 4 & tpost == `tpost', sort) ///

(connected bias period if controls == 8 & tpost == `tpost', sort) ///

(connected bias period if controls == 12 & tpost == `tpost', sort) ///

(connected bias period if controls == 16 & tpost == `tpost', sort) ///

(connected bias period if controls == 20 & tpost == `tpost', sort), ///

legend(order(1 "4" 2 "8" 3 "12" 4 "16" 5 "20") ///

title("Controls", size(medium))) ///

xtitle("Period") ///

ytitle("% Bias") ///

ylabel(-10(2)10) ///

title("`title'")

graph save "Graph" "C:\Users\Ariel\Desktop\ITSA_stuff\compare models\trend_bias_prais_.25_graph.gph"

************************

*** graph std errs *****

************************

use "C:\Users\Ariel\Desktop\ITSA_stuff\compare models\trend_prais.dta", clear

local tpost 1.25

local title (A)

set scheme stmono2

twoway ///

(connected se period if controls == 4 & tpost == `tpost', sort) ///

(connected se period if controls == 8 & tpost == `tpost', sort) ///

(connected se period if controls == 12 & tpost == `tpost', sort) ///

(connected se period if controls == 16 & tpost == `tpost', sort) ///

(connected se period if controls == 20 & tpost == `tpost', sort), ///

legend(order(1 "4" 2 "8" 3 "12" 4 "16" 5 "20") ///

title("Controls", size(medium))) ///

xtitle("Period") ///

ytitle("Empirical Std Err.") ///

ylabel(0(.1).5) ///

title("`title'")

graph save "Graph" "C:\Users\Ariel\Desktop\ITSA_stuff\compare models\trend_se_prais_.25_graph.gph"

************************

*** graph RMSE *****

************************

use "C:\Users\Ariel\Desktop\ITSA_stuff\compare models\trend_prais.dta", clear

local tpost 1.25

local title (D)

set scheme stmono2

twoway ///

(connected rmse period if controls == 4 & tpost == `tpost', sort) ///

(connected rmse period if controls == 8 & tpost == `tpost', sort) ///

(connected rmse period if controls == 12 & tpost == `tpost', sort) ///

(connected rmse period if controls == 16 & tpost == `tpost', sort) ///

(connected rmse period if controls == 20 & tpost == `tpost', sort), ///

legend(order(1 "4" 2 "8" 3 "12" 4 "16" 5 "20") ///

title("Controls", size(medium))) ///

xtitle("Period") ///

ytitle("RMSE") ///

ylabel(0.90(.05)1.1) ///

title("`title'")

graph save "Graph" "C:\Users\Ariel\Desktop\ITSA_stuff\compare models\trend_rmse_prais_.25_graph.gph"

****************************

*** graph 95% coverage *****

****************************

use "C:\Users\Ariel\Desktop\ITSA_stuff\compare models\trend_prais.dta", clear

local tpost 1.25

local title (A)

set scheme stmono2

twoway ///

(connected coverage period if controls == 4 & tpost == `tpost', sort) ///

(connected coverage period if controls == 8 & tpost == `tpost', sort) ///

(connected coverage period if controls == 12 & tpost == `tpost', sort) ///

(connected coverage period if controls == 16 & tpost == `tpost', sort) ///

(connected coverage period if controls == 20 & tpost == `tpost', sort), ///

legend(order(1 "4" 2 "8" 3 "12" 4 "16" 5 "20") ///

title("Controls", size(medium))) ///

xtitle("Period") ///

ytitle("95% Coverage") ///

ylabel(0.60(.10)1) ///

title("`title'")

graph save "Graph" "C:\Users\Ariel\Desktop\ITSA_stuff\compare models\trend_cover_prais_.25_graph.gph"

*****************************

* combine NW and PRAIS graphs

*****************************

*********

* trend *

*********

* order these by tpost value

gr combine "C:\Users\Ariel\Desktop\ITSA_stuff\compare models\trend_nw_.25_graph.gph" ///

"C:\Users\Ariel\Desktop\ITSA_stuff\compare models\trend_prais_.25_graph.gph" ///

"C:\Users\Ariel\Desktop\ITSA_stuff\compare models\trend_nw_.50_graph.gph" ///

"C:\Users\Ariel\Desktop\ITSA_stuff\compare models\trend_prais_.50_graph.gph" ///

"C:\Users\Ariel\Desktop\ITSA_stuff\compare models\trend_nw_1.0_graph.gph" ///

"C:\Users\Ariel\Desktop\ITSA_stuff\compare models\trend_prais_1.0_graph.gph" ///

, col(2) altshrink

graph save "Graph" "C:\Users\Ariel\Desktop\ITSA_stuff\compare models\trend_ac_prais_.25_graph.gph", replace

*****************

* autocorrelation

*****************

gr combine "C:\Users\Ariel\Desktop\ITSA_stuff\compare models\trend_ac_nw_.25_graph.gph" ///

"C:\Users\Ariel\Desktop\ITSA_stuff\compare models\trend_ac_prais_.25_graph.gph" ///

"C:\Users\Ariel\Desktop\ITSA_stuff\compare models\trend_ac_nw_.50_graph.gph" ///

"C:\Users\Ariel\Desktop\ITSA_stuff\compare models\trend_ac_prais_.50_graph.gph" ///

"C:\Users\Ariel\Desktop\ITSA_stuff\compare models\trend_ac_nw_1.0_graph.gph" ///

"C:\Users\Ariel\Desktop\ITSA_stuff\compare models\trend_ac_prais_1.0_graph.gph" ///

, col(2) altshrink

graph save "Graph" "C:\Users\Ariel\Desktop\ITSA_stuff\compare models\combined_trend_ac_graph.gph", replace

*********

* bias *

*********

* order these by tpost value

gr combine "C:\Users\Ariel\Desktop\ITSA_stuff\compare models\trend_bias_nw_.25_graph.gph" ///

"C:\Users\Ariel\Desktop\ITSA_stuff\compare models\trend_bias_prais_.25_graph.gph" ///

"C:\Users\Ariel\Desktop\ITSA_stuff\compare models\trend_bias_nw_.50_graph.gph" ///

"C:\Users\Ariel\Desktop\ITSA_stuff\compare models\trend_bias_prais_.50_graph.gph" ///

"C:\Users\Ariel\Desktop\ITSA_stuff\compare models\trend_bias_nw_1.0_graph.gph" ///

"C:\Users\Ariel\Desktop\ITSA_stuff\compare models\trend_bias_prais_1.0_graph.gph" ///

, col(2) altshrink

graph save "Graph" "C:\Users\Ariel\Desktop\ITSA_stuff\compare models\combined_trend_bias_graph.gph", replace

*********

* SE *

*********

gr combine "C:\Users\Ariel\Desktop\ITSA_stuff\compare models\trend_se_nw_.25_graph.gph" ///

"C:\Users\Ariel\Desktop\ITSA_stuff\compare models\trend_se_prais_.25_graph.gph" ///

"C:\Users\Ariel\Desktop\ITSA_stuff\compare models\trend_se_nw_.50_graph.gph" ///

"C:\Users\Ariel\Desktop\ITSA_stuff\compare models\trend_se_prais_.50_graph.gph" ///

"C:\Users\Ariel\Desktop\ITSA_stuff\compare models\trend_se_nw_1.0_graph.gph" ///

"C:\Users\Ariel\Desktop\ITSA_stuff\compare models\trend_se_prais_1.0_graph.gph" ///

, col(2) altshrink

graph save "Graph" "C:\Users\Ariel\Desktop\ITSA_stuff\compare models\combined_trend_se_graph.gph", replace

*********

* RMSE *

*********

gr combine "C:\Users\Ariel\Desktop\ITSA_stuff\compare models\trend_rmse_nw_.25_graph.gph" ///

"C:\Users\Ariel\Desktop\ITSA_stuff\compare models\trend_rmse_prais_.25_graph.gph" ///

"C:\Users\Ariel\Desktop\ITSA_stuff\compare models\trend_rmse_nw_.50_graph.gph" ///

"C:\Users\Ariel\Desktop\ITSA_stuff\compare models\trend_rmse_prais_.50_graph.gph" ///

"C:\Users\Ariel\Desktop\ITSA_stuff\compare models\trend_rmse_nw_1.0_graph.gph" ///

"C:\Users\Ariel\Desktop\ITSA_stuff\compare models\trend_rmse_prais_1.0_graph.gph" ///

, col(2) altshrink

graph save "Graph" "C:\Users\Ariel\Desktop\ITSA_stuff\compare models\combined_trend_rmse_graph.gph", replace

************

* Coverage *

************

gr combine "C:\Users\Ariel\Desktop\ITSA_stuff\compare models\trend_cover_nw_.25_graph.gph" ///

"C:\Users\Ariel\Desktop\ITSA_stuff\compare models\trend_cover_prais_.25_graph.gph" ///

"C:\Users\Ariel\Desktop\ITSA_stuff\compare models\trend_cover_nw_.50_graph.gph" ///

"C:\Users\Ariel\Desktop\ITSA_stuff\compare models\trend_cover_prais_.50_graph.gph" ///

"C:\Users\Ariel\Desktop\ITSA_stuff\compare models\trend_cover_nw_1.0_graph.gph" ///

"C:\Users\Ariel\Desktop\ITSA_stuff\compare models\trend_cover_prais_1.0_graph.gph" ///

, col(2) altshrink

graph save "Graph" "C:\Users\Ariel\Desktop\ITSA_stuff\compare models\combined_trend_cover_graph.gph", replace

***********************************************************************

********* level *****

***********************************************************************

********************************

***** OLS with NW std errs ****

*******************************

set scheme stmono2

* level change (20% 25% 30% increase); 10-50 time periods; 4-20 controls; 1 sd for white noise

power multi_itsa, n(10(5)50) contcnt(4(4)20) tint(10) cint(10) tpre(0) cpre(0) tstep(2 2.5 3) cstep(0) tsd(1) csd(1) cpost(0) tpost(0) tacorr(.20) cacorr(.20) reps(2000) ///

noi table level ///seed(1234)

mat effect = r(pss_table)

svmat effect

rename effect1 alpha

rename effect2 power

rename effect3 period

rename effect4 controls

rename effect5 trper

rename effect6 tint

rename effect7 tpre

rename effect8 tpost

rename effect9 tstep

rename effect10 tcorr

rename effect11 cint

rename effect12 cpre

rename effect13 cpost

rename effect14 cstep

rename effect15 ccorr

rename effect16 reps

rename effect17 bias

rename effect18 rmse

rename effect19 coverage

rename effect20 se

save "C:\Users\Ariel\Desktop\ITSA_stuff\compare models\level_nw.dta", replace

*** graph it ***

use "C:\Users\Ariel\Desktop\ITSA_stuff\compare models\level_nw.dta", clear

local tstep 3

local title (C)

set scheme stmono2

twoway ///

(connected power period if controls == 4 & tstep == `tstep', sort) ///

(connected power period if controls == 8 & tstep == `tstep', sort) ///

(connected power period if controls == 12 & tstep == `tstep', sort) ///

(connected power period if controls == 16 & tstep == `tstep', sort) ///

(connected power period if controls == 20 & tstep == `tstep', sort), ///

legend(order(1 "4" 2 "8" 3 "12" 4 "16" 5 "20") ///

title("Controls", size(medium))) ///

xtitle("Period") ///

ytitle("Power (1-{&beta})") ///

ylabel(0.2(.2)1) ///

title("`title'")

graph save "Graph" "C:\Users\Ariel\Desktop\ITSA_stuff\compare models\level_nw_.30_graph.gph"

*****************************

*** autocorrelation NW *****

*****************************

set scheme stmono2

forvalues ac = -0.9(0.3)0.9 {

power multi_itsa, n(10(5)50) contcnt(12) ///

tint(10) cint(10) tpre(1) cpre(1) ///

tstep(2 2.5 3) cstep(0) tsd(1) csd(1) ///

cpost(1) tpost(1) ///

tacorr(`ac') cacorr(`ac') alpha(0.05) reps(2000) ///

noi table level /// seed(1234)

mat effect = nullmat(effect) \ r(pss_table)

}

svmat effect

rename effect1 alpha

rename effect2 power

rename effect3 period

rename effect4 controls

rename effect5 trper

rename effect6 tint

rename effect7 tpre

rename effect8 tpost

rename effect9 tstep

rename effect10 tcorr

rename effect11 cint

rename effect12 cpre

rename effect13 cpost

rename effect14 cstep

rename effect15 ccorr

rename effect16 reps

rename effect17 bias

rename effect18 rmse

rename effect19 coverage

rename effect20 se

save "C:\Users\Ariel\Desktop\ITSA_stuff\compare models\level_nw_ac.dta", replace

* graph it

use "C:\Users\Ariel\Desktop\ITSA_stuff\compare models\level_nw_ac.dta", replace

tempvar test

gen str4 `test' = string(tcorr, "%4.1f")

local tstep 3

local title (C)

set scheme stmono2

twoway ///

(connected power period if `test' == "-0.9" & tstep == `tstep', sort) ///

(connected power period if `test' == "-0.6" & tstep == `tstep', sort) ///

(connected power period if `test' == "-0.3" & tstep == `tstep', sort) ///

(connected power period if `test' == "0.0" & tstep == `tstep', sort) ///

(connected power period if `test' == "0.3" & tstep == `tstep', sort) ///

(connected power period if `test' == "0.6" & tstep == `tstep', sort) ///

(connected power period if `test' == "0.9" & tstep == `tstep', sort), ///

legend(order(1 "-0.9" 2 "-0.6" 3 "-0.3" 4 "0" 5 "0.3" 6 "0.6" 7 "0.9") ///

title("Autocorr", size(medium))) ///

xtitle("Period") ///

ytitle("Power(1-{&beta})") ///

ylabel(.2(.2)1) ///

title("`title'")

graph save "Graph" "C:\Users\Ariel\Desktop\ITSA_stuff\compare models\level_ac_nw_.20_graph.gph"

********************

*** graph bias *****

********************

use "C:\Users\Ariel\Desktop\ITSA_stuff\compare models\level_nw.dta", clear

local tstep 3

local title (C)

set scheme stmono2

twoway ///

(connected bias period if controls == 4 & tstep == `tstep', sort) ///

(connected bias period if controls == 8 & tstep == `tstep', sort) ///

(connected bias period if controls == 12 & tstep == `tstep', sort) ///

(connected bias period if controls == 16 & tstep == `tstep', sort) ///

(connected bias period if controls == 20 & tstep == `tstep', sort), ///

legend(order(1 "4" 2 "8" 3 "12" 4 "16" 5 "20") ///

title("Controls", size(medium))) ///

xtitle("Period") ///

ytitle("% Bias") ///

ylabel(-10(2)10) ///

title("`title'")

graph save "Graph" "C:\Users\Ariel\Desktop\ITSA_stuff\compare models\level_bias_nw_.20_graph.gph"

************************

*** graph std errs *****

************************

use "C:\Users\Ariel\Desktop\ITSA_stuff\compare models\level_nw.dta", clear

local tstep 3

local title (C)

set scheme stmono2

twoway ///

(connected se period if controls == 4 & tstep == `tstep', sort) ///

(connected se period if controls == 8 & tstep == `tstep', sort) ///

(connected se period if controls == 12 & tstep == `tstep', sort) ///

(connected se period if controls == 16 & tstep == `tstep', sort) ///

(connected se period if controls == 20 & tstep == `tstep', sort), ///

legend(order(1 "4" 2 "8" 3 "12" 4 "16" 5 "20") ///

title("Controls", size(medium))) ///

xtitle("Period") ///

ytitle("Empirical Std Err.") ///

ylabel(0.5(.25)1.5) ///

title("`title'")

graph save "Graph" "C:\Users\Ariel\Desktop\ITSA_stuff\compare models\level_se_nw_.20_graph.gph"

************************

*** graph RMSE *****

************************

use "C:\Users\Ariel\Desktop\ITSA_stuff\compare models\level_nw.dta", clear

local tstep 3

local title (C)

set scheme stmono2

twoway ///

(connected rmse period if controls == 4 & tstep == `tstep', sort) ///

(connected rmse period if controls == 8 & tstep == `tstep', sort) ///

(connected rmse period if controls == 12 & tstep == `tstep', sort) ///

(connected rmse period if controls == 16 & tstep == `tstep', sort) ///

(connected rmse period if controls == 20 & tstep == `tstep', sort), ///

legend(order(1 "4" 2 "8" 3 "12" 4 "16" 5 "20") ///

title("Controls", size(medium))) ///

xtitle("Period") ///

ytitle("RMSE") ///

ylabel(0.90(.05)1.1) ///

title("`title'")

graph save "Graph" "C:\Users\Ariel\Desktop\ITSA_stuff\compare models\level_rmse_nw_.20_graph.gph"

****************************

*** graph 95% coverage *****

****************************

use "C:\Users\Ariel\Desktop\ITSA_stuff\compare models\level_nw.dta", clear

local tstep 3

local title (C)

set scheme stmono2

twoway ///

(connected coverage period if controls == 4 & tstep == `tstep', sort) ///

(connected coverage period if controls == 8 & tstep == `tstep', sort) ///

(connected coverage period if controls == 12 & tstep == `tstep', sort) ///

(connected coverage period if controls == 16 & tstep == `tstep', sort) ///

(connected coverage period if controls == 20 & tstep == `tstep', sort), ///

legend(order(1 "4" 2 "8" 3 "12" 4 "16" 5 "20") ///

title("Controls", size(medium))) ///

xtitle("Period") ///

ytitle("95% Coverage") ///

ylabel(0.60(.10)1) ///

title("`title'")

graph save "Graph" "C:\Users\Ariel\Desktop\ITSA_stuff\compare models\level_cover_nw_.20_graph.gph"

**************************

***** Prais-Winsten *****

**************************

set scheme stmono2

* level change (20% 25% 30% increase); 10-50 time periods; 4-20 controls; 1 sd for white noise

power multi_itsa, n(10(5)50) contcnt(4(4)20) tint(10) cint(10) tpre(0) cpre(0) tstep(2 2.5 3) cstep(0) tsd(1) csd(1) cpost(0) tpost(0) tacorr(.20) cacorr(.20) reps(2000) ///

noi table level prais ///seed(1234)

mat effect = r(pss_table)

svmat effect

rename effect1 alpha

rename effect2 power

rename effect3 period

rename effect4 controls

rename effect5 trper

rename effect6 tint

rename effect7 tpre

rename effect8 tpost

rename effect9 tstep

rename effect10 tcorr

rename effect11 cint

rename effect12 cpre

rename effect13 cpost

rename effect14 cstep

rename effect15 ccorr

rename effect16 reps

rename effect17 bias

rename effect18 rmse

rename effect19 coverage

rename effect20 se

save "C:\Users\Ariel\Desktop\ITSA_stuff\compare models\level_prais.dta", replace

*** graph it ***

use "C:\Users\Ariel\Desktop\ITSA_stuff\compare models\level_prais.dta", clear

local tstep 2

local title (D)

set scheme stmono2

twoway ///

(connected power period if controls == 4 & tstep == `tstep', sort) ///

(connected power period if controls == 8 & tstep == `tstep', sort) ///

(connected power period if controls == 12 & tstep == `tstep', sort) ///

(connected power period if controls == 16 & tstep == `tstep', sort) ///

(connected power period if controls == 20 & tstep == `tstep', sort), ///

legend(order(1 "4" 2 "8" 3 "12" 4 "16" 5 "20") ///

title("Controls", size(medium))) ///

xtitle("Period") ///

ytitle("Power (1-{&beta})") ///

ylabel(0.2(.2)1) ///

title("`title'")

graph save "Graph" "C:\Users\Ariel\Desktop\ITSA_stuff\compare models\level_prais_.30_graph.gph"

*******************************

*** autocorrelation prais *****

*******************************

set scheme stmono2

forvalues ac = -0.9(0.3)0.9 {

power multi_itsa, n(10(5)50) contcnt(12) ///

tint(10) cint(10) tpre(1) cpre(1) ///

tstep(2 2.5 3) cstep(0) tsd(1) csd(1) ///

cpost(1) tpost(1) ///

tacorr(`ac') cacorr(`ac') alpha(0.05) reps(2000) ///

noi table level prais /// seed(1234)

mat effect = nullmat(effect) \ r(pss_table)

}

svmat effect

rename effect1 alpha

rename effect2 power

rename effect3 period

rename effect4 controls

rename effect5 trper

rename effect6 tint

rename effect7 tpre

rename effect8 tpost

rename effect9 tstep

rename effect10 tcorr

rename effect11 cint

rename effect12 cpre

rename effect13 cpost

rename effect14 cstep

rename effect15 ccorr

rename effect16 reps

rename effect17 bias

rename effect18 rmse

rename effect19 coverage

rename effect20 se

save "C:\Users\Ariel\Desktop\ITSA_stuff\compare models\level_prais_ac.dta", replace

* graph it

use "C:\Users\Ariel\Desktop\ITSA_stuff\compare models\level_prais_ac.dta", replace

tempvar test

gen str4 `test' = string(tcorr, "%4.1f")

local tstep 3

local title (F)

set scheme stmono2

twoway ///

(connected power period if `test' == "-0.9" & tstep == `tstep', sort) ///

(connected power period if `test' == "-0.6" & tstep == `tstep', sort) ///

(connected power period if `test' == "-0.3" & tstep == `tstep', sort) ///

(connected power period if `test' == "0.0" & tstep == `tstep', sort) ///

(connected power period if `test' == "0.3" & tstep == `tstep', sort) ///

(connected power period if `test' == "0.6" & tstep == `tstep', sort) ///

(connected power period if `test' == "0.9" & tstep == `tstep', sort), ///

legend(order(1 "-0.9" 2 "-0.6" 3 "-0.3" 4 "0" 5 "0.3" 6 "0.6" 7 "0.9") ///

title("Autocorr", size(medium))) ///

xtitle("Period") ///

ytitle("Power(1-{&beta})") ///

ylabel(.2(.2)1) ///

title("`title'")

graph save "Graph" "C:\Users\Ariel\Desktop\ITSA_stuff\compare models\level_ac_prais_.20_graph.gph"

********************

*** graph bias *****

********************

use "C:\Users\Ariel\Desktop\ITSA_stuff\compare models\level_prais.dta", clear

local tstep 3

local title (F)

set scheme stmono2

twoway ///

(connected bias period if controls == 4 & tstep == `tstep', sort) ///

(connected bias period if controls == 8 & tstep == `tstep', sort) ///

(connected bias period if controls == 12 & tstep == `tstep', sort) ///

(connected bias period if controls == 16 & tstep == `tstep', sort) ///

(connected bias period if controls == 20 & tstep == `tstep', sort), ///

legend(order(1 "4" 2 "8" 3 "12" 4 "16" 5 "20") ///

title("Controls", size(medium))) ///

xtitle("Period") ///

ytitle("% Bias") ///

ylabel(-10(2)10) ///

title("`title'")

graph save "Graph" "C:\Users\Ariel\Desktop\ITSA_stuff\compare models\level_bias_prais_.30_graph.gph"

************************

*** graph std errs *****

************************

use "C:\Users\Ariel\Desktop\ITSA_stuff\compare models\level_prais.dta", clear

local tstep 3

local title (F)

set scheme stmono2

twoway ///

(connected se period if controls == 4 & tstep == `tstep', sort) ///

(connected se period if controls == 8 & tstep == `tstep', sort) ///

(connected se period if controls == 12 & tstep == `tstep', sort) ///

(connected se period if controls == 16 & tstep == `tstep', sort) ///

(connected se period if controls == 20 & tstep == `tstep', sort), ///

legend(order(1 "4" 2 "8" 3 "12" 4 "16" 5 "20") ///

title("Controls", size(medium))) ///

xtitle("Period") ///

ytitle("Empirical Std Err.") ///

ylabel(0.5(.25)1.5) ///

title("`title'")

graph save "Graph" "C:\Users\Ariel\Desktop\ITSA_stuff\compare models\level_se_prais_.30_graph.gph"

************************

*** graph RMSE *****

************************

use "C:\Users\Ariel\Desktop\ITSA_stuff\compare models\level_prais.dta", clear

local tstep 3

local title (F)

set scheme stmono2

twoway ///

(connected rmse period if controls == 4 & tstep == `tstep', sort) ///

(connected rmse period if controls == 8 & tstep == `tstep', sort) ///

(connected rmse period if controls == 12 & tstep == `tstep', sort) ///

(connected rmse period if controls == 16 & tstep == `tstep', sort) ///

(connected rmse period if controls == 20 & tstep == `tstep', sort), ///

legend(order(1 "4" 2 "8" 3 "12" 4 "16" 5 "20") ///

title("Controls", size(medium))) ///

xtitle("Period") ///

ytitle("RMSE") ///

ylabel(0.90(.05)1.1) ///

title("`title'")

graph save "Graph" "C:\Users\Ariel\Desktop\ITSA_stuff\compare models\level_rmse_prais_.30_graph.gph"

****************************

*** graph 95% coverage *****

****************************

use "C:\Users\Ariel\Desktop\ITSA_stuff\compare models\level_prais.dta", clear

local tstep 3

local title (F)

set scheme stmono2

twoway ///

(connected coverage period if controls == 4 & tstep == `tstep', sort) ///

(connected coverage period if controls == 8 & tstep == `tstep', sort) ///

(connected coverage period if controls == 12 & tstep == `tstep', sort) ///

(connected coverage period if controls == 16 & tstep == `tstep', sort) ///

(connected coverage period if controls == 20 & tstep == `tstep', sort), ///

legend(order(1 "4" 2 "8" 3 "12" 4 "16" 5 "20") ///

title("Controls", size(medium))) ///

xtitle("Period") ///

ytitle("95% Coverage") ///

ylabel(0.60(.10)1) ///

title("`title'")

graph save "Graph" "C:\Users\Ariel\Desktop\ITSA_stuff\compare models\level_cover_prais_.30_graph.gph"

*****************************

* combine NW and PRAIS graphs

*****************************

*********

* level *

*********

* order these by tpost value

gr combine "C:\Users\Ariel\Desktop\ITSA_stuff\compare models\level_nw_.20_graph.gph" ///

"C:\Users\Ariel\Desktop\ITSA_stuff\compare models\level_prais_.20_graph.gph" ///

"C:\Users\Ariel\Desktop\ITSA_stuff\compare models\level_nw_.25_graph.gph" ///

"C:\Users\Ariel\Desktop\ITSA_stuff\compare models\level_prais_.25_graph.gph" ///

"C:\Users\Ariel\Desktop\ITSA_stuff\compare models\level_nw_.30_graph.gph" ///

"C:\Users\Ariel\Desktop\ITSA_stuff\compare models\level_prais_.30_graph.gph" ///

, col(2) altshrink

graph save "Graph" "C:\Users\Ariel\Desktop\ITSA_stuff\compare models\combined_level_graph.gph", replace

*****************

* autocorrelation

*****************

gr combine "C:\Users\Ariel\Desktop\ITSA_stuff\compare models\level_ac_nw_.20_graph.gph" ///

"C:\Users\Ariel\Desktop\ITSA_stuff\compare models\level_ac_prais_.20_graph.gph" ///

"C:\Users\Ariel\Desktop\ITSA_stuff\compare models\level_ac_nw_.25_graph.gph" ///

"C:\Users\Ariel\Desktop\ITSA_stuff\compare models\level_ac_prais_.25_graph.gph" ///

"C:\Users\Ariel\Desktop\ITSA_stuff\compare models\level_ac_nw_.30_graph.gph" ///

"C:\Users\Ariel\Desktop\ITSA_stuff\compare models\level_ac_prais_.30_graph.gph" ///

, col(2) altshrink

graph save "Graph" "C:\Users\Ariel\Desktop\ITSA_stuff\compare models\combined_level_ac_graph.gph", replace

*********

* bias *

*********

* order these by tstep value

gr combine "C:\Users\Ariel\Desktop\ITSA_stuff\compare models\level_bias_nw_.20_graph.gph" ///

"C:\Users\Ariel\Desktop\ITSA_stuff\compare models\level_bias_prais_.20_graph.gph" ///

"C:\Users\Ariel\Desktop\ITSA_stuff\compare models\level_bias_nw_.25_graph.gph" ///

"C:\Users\Ariel\Desktop\ITSA_stuff\compare models\level_bias_prais_.25_graph.gph" ///

"C:\Users\Ariel\Desktop\ITSA_stuff\compare models\level_bias_nw_.30_graph.gph" ///

"C:\Users\Ariel\Desktop\ITSA_stuff\compare models\level_bias_prais_.30_graph.gph" ///

, col(2) altshrink

graph save "Graph" "C:\Users\Ariel\Desktop\ITSA_stuff\compare models\combined_level_bias_graph.gph", replace

*********

* SE *

*********

gr combine "C:\Users\Ariel\Desktop\ITSA_stuff\compare models\level_se_nw_.20_graph.gph" ///

"C:\Users\Ariel\Desktop\ITSA_stuff\compare models\level_se_prais_.20_graph.gph" ///

"C:\Users\Ariel\Desktop\ITSA_stuff\compare models\level_se_nw_.25_graph.gph" ///

"C:\Users\Ariel\Desktop\ITSA_stuff\compare models\level_se_prais_.25_graph.gph" ///

"C:\Users\Ariel\Desktop\ITSA_stuff\compare models\level_se_nw_.30_graph.gph" ///

"C:\Users\Ariel\Desktop\ITSA_stuff\compare models\level_se_prais_.30_graph.gph" ///

, col(2) altshrink

graph save "Graph" "C:\Users\Ariel\Desktop\ITSA_stuff\compare models\combined_level_se_graph.gph", replace

*********

* RMSE *

*********

gr combine "C:\Users\Ariel\Desktop\ITSA_stuff\compare models\level_rmse_nw_.20_graph.gph" ///

"C:\Users\Ariel\Desktop\ITSA_stuff\compare models\level_rmse_prais_.20_graph.gph" ///

"C:\Users\Ariel\Desktop\ITSA_stuff\compare models\level_rmse_nw_.25_graph.gph" ///

"C:\Users\Ariel\Desktop\ITSA_stuff\compare models\level_rmse_prais_.25_graph.gph" ///

"C:\Users\Ariel\Desktop\ITSA_stuff\compare models\level_rmse_nw_.30_graph.gph" ///

"C:\Users\Ariel\Desktop\ITSA_stuff\compare models\level_rmse_prais_.30_graph.gph" ///

, col(2) altshrink

graph save "Graph" "C:\Users\Ariel\Desktop\ITSA_stuff\compare models\combined_level_rmse_graph.gph", replace

************

* Coverage *

************

gr combine "C:\Users\Ariel\Desktop\ITSA_stuff\compare models\level_cover_nw_.20_graph.gph" ///

"C:\Users\Ariel\Desktop\ITSA_stuff\compare models\level_cover_prais_.20_graph.gph" ///

"C:\Users\Ariel\Desktop\ITSA_stuff\compare models\level_cover_nw_.25_graph.gph" ///

"C:\Users\Ariel\Desktop\ITSA_stuff\compare models\level_cover_prais_.25_graph.gph" ///

"C:\Users\Ariel\Desktop\ITSA_stuff\compare models\level_cover_nw_.30_graph.gph" ///

"C:\Users\Ariel\Desktop\ITSA_stuff\compare models\level_cover_prais_.30_graph.gph" ///

, col(2) altshrink

graph save "Graph" "C:\Users\Ariel\Desktop\ITSA_stuff\compare models\combined_level_cover_graph.gph", replace

**********************************************************************************************

******************************* sensitivity analyses *****************************************

**********************************************************************************************

******************************

* #1 different baseline trends

******************************

***** OLS with NW std errs ****

* pre-to-post trend change when the starting trend for tx is 5 and starting trend for controls is 1

power multi_itsa, n(10(5)50) contcnt(4(4)20) tint(10) cint(10) tpre(5) cpre(1) tstep(0) cstep(0) tsd(1) csd(1) cpost(1) tpost(5.25 5.50 6) tacorr(.20) cacorr(.20) reps(2000) noi alpha(0.05) ///

/// seed(1234)

mat effect = r(pss_table)

svmat effect

rename effect1 alpha

rename effect2 power

rename effect3 period

rename effect4 controls

rename effect5 trper

rename effect6 tint

rename effect7 tpre

rename effect8 tpost

rename effect9 tstep

rename effect10 tcorr

rename effect11 cint

rename effect12 cpre

rename effect13 cpost

rename effect14 cstep

rename effect15 ccorr

rename effect16 reps

rename effect17 bias

rename effect18 rmse

rename effect19 coverage

rename effect20 se

gen model = "nw"

save "C:\Users\Ariel\Desktop\ITSA_stuff\compare models\sens1_nw.dta", replace

***** Prais-Winsten *****

power multi_itsa, n(10(10)50) contcnt(4(4)20) tint(10) cint(10) tpre(5) cpre(1) tstep(0) cstep(0) tsd(1) csd(1) cpost(1) tpost(5.25 5.50 6) tacorr(.20) cacorr(.20) reps(2000) noi alpha(0.05) ///

prais /// seed(1234)

mat effect = r(pss_table)

svmat effect

rename effect1 alpha

rename effect2 power

rename effect3 period

rename effect4 controls

rename effect5 trper

rename effect6 tint

rename effect7 tpre

rename effect8 tpost

rename effect9 tstep

rename effect10 tcorr

rename effect11 cint

rename effect12 cpre

rename effect13 cpost

rename effect14 cstep

rename effect15 ccorr

rename effect16 reps

rename effect17 bias

rename effect18 rmse

rename effect19 coverage

rename effect20 se

gen model = "prais"

save "C:\Users\Ariel\Desktop\ITSA_stuff\compare models\sens1_prais.dta", replace

**************************************

* combine data sets and generate graph

**************************************

use "C:\Users\Ariel\Desktop\ITSA_stuff\compare models\sens1_nw.dta", replace

append using "C:\Users\Ariel\Desktop\ITSA_stuff\compare models\sens1_prais.dta"

save "C:\Users\Ariel\Desktop\ITSA_stuff\compare models\sens1_combine.dta", replace

******

use "C:\Users\Ariel\Desktop\ITSA_stuff\compare models\sens1_combine.dta", replace

set scheme stmono2

local controls 12

local tpost 5.5

twoway ///

(connected power period if model == "nw" & controls == `controls' & tpost == `tpost', sort) ///

(connected power period if model == "prais" & controls == `controls' & tpost == `tpost', sort), ///

legend(order(1 "OLS-NW" 2 "PW") ///

title("Model", size(medium))) ///

xtitle("Period") ///

ytitle("Power(1-{&beta})") ///

ylabel(.2(.2)1)

graph save "Graph" "C:\Users\Ariel\Desktop\ITSA_stuff\compare models\sens1.gph", replace

******************************

* #2 different baseline levels

******************************

***** OLS with NW std errs ****

* pre-to-post trend change when the starting trend for tx is 5 and starting trend for controls is 1

power multi_itsa, n(10(10)50) contcnt(4(4)20) tint(10) cint(8) tpre(0) cpre(0) tstep(2) cstep(0) tsd(1) csd(1) cpost(0) tpost(0) tacorr(.20) cacorr(.20) reps(2000) noi alpha(0.05) ///

level /// seed(1234)

mat effect = r(pss_table)

svmat effect

rename effect1 alpha

rename effect2 power

rename effect3 period

rename effect4 controls

rename effect5 trper

rename effect6 tint

rename effect7 tpre

rename effect8 tpost

rename effect9 tstep

rename effect10 tcorr

rename effect11 cint

rename effect12 cpre

rename effect13 cpost

rename effect14 cstep

rename effect15 ccorr

rename effect16 reps

rename effect17 bias

rename effect18 rmse

rename effect19 coverage

rename effect20 se

gen model = "nw"

save "C:\Users\Ariel\Desktop\ITSA_stuff\compare models\sens2_nw.dta", replace

***** Prais-Winsten *****

power multi_itsa, n(10(10)50) contcnt(4(4)20) tint(10) cint(8) tpre(0) cpre(0) tstep(2) cstep(0) tsd(1) csd(1) cpost(0) tpost(0) tacorr(.20) cacorr(.20) reps(2000) noi alpha(0.05) ///

level prais /// seed(1234)

mat effect = r(pss_table)

svmat effect

rename effect1 alpha

rename effect2 power

rename effect3 period

rename effect4 controls

rename effect5 trper

rename effect6 tint

rename effect7 tpre

rename effect8 tpost

rename effect9 tstep

rename effect10 tcorr

rename effect11 cint

rename effect12 cpre

rename effect13 cpost

rename effect14 cstep

rename effect15 ccorr

rename effect16 reps

rename effect17 bias

rename effect18 rmse

rename effect19 coverage

rename effect20 se

gen model = "prais"

save "C:\Users\Ariel\Desktop\ITSA_stuff\compare models\sens2_prais.dta", replace

**************************************

* combine data sets and generate graph

**************************************

use "C:\Users\Ariel\Desktop\ITSA_stuff\compare models\sens2_nw.dta", replace

append using "C:\Users\Ariel\Desktop\ITSA_stuff\compare models\sens2_prais.dta"

save "C:\Users\Ariel\Desktop\ITSA_stuff\compare models\sens2_combine.dta", replace

use "C:\Users\Ariel\Desktop\ITSA_stuff\compare models\sens2_combine.dta", replace

set scheme stmono2

local controls 12

twoway ///

(connected power period if model == "nw" & controls == `controls', sort) ///

(connected power period if model == "prais" & controls == `controls', sort), ///

legend(order(1 "OLS-NW" 2 "PW") ///

title("Model", size(medium))) ///

xtitle("Period") ///

ytitle("Power(1-{&beta})") ///

ylabel(.2(.2)1)

graph save "Graph" "C:\Users\Ariel\Desktop\ITSA_stuff\compare models\sens2.gph", replace

**********************************************************************************************************************************************

* #3 change in level and trend (control's baseline level = 8; treatment baseline level = 10, treatment step = 30% treatment post-trend = 100%)

**********************************************************************************************************************************************

***** OLS with NW std errs ****

* pre-to-post trend change when the starting trend for tx is 5 and starting trend for controls is 1

power multi_itsa, n(10(10)50) contcnt(4(4)20) tint(10) cint(8) tpre(1) cpre(1) tstep(2) cstep(0) tsd(1) csd(1) cpost(1) tpost(2) tacorr(.20) cacorr(.20) reps(2000) noi alpha(0.05) ///

/// seed(1234)

mat effect = r(pss_table)

svmat effect

rename effect1 alpha

rename effect2 power

rename effect3 period

rename effect4 controls

rename effect5 trper

rename effect6 tint

rename effect7 tpre

rename effect8 tpost

rename effect9 tstep

rename effect10 tcorr

rename effect11 cint

rename effect12 cpre

rename effect13 cpost

rename effect14 cstep

rename effect15 ccorr

rename effect16 reps

rename effect17 bias

rename effect18 rmse

rename effect19 coverage

rename effect20 se

gen model = "nw"

save "C:\Users\Ariel\Desktop\ITSA_stuff\compare models\sens3_nw.dta", replace

***** Prais-Winsten *****

power multi_itsa, n(10(10)50) contcnt(4(4)20) tint(10) cint(8) tpre(1) cpre(1) tstep(2) cstep(0) tsd(1) csd(1) cpost(1) tpost(2) tacorr(.20) cacorr(.20) reps(2000) noi alpha(0.05) ///

prais /// seed(1234)

mat effect = r(pss_table)

svmat effect

rename effect1 alpha

rename effect2 power

rename effect3 period

rename effect4 controls

rename effect5 trper

rename effect6 tint

rename effect7 tpre

rename effect8 tpost

rename effect9 tstep

rename effect10 tcorr

rename effect11 cint

rename effect12 cpre

rename effect13 cpost

rename effect14 cstep

rename effect15 ccorr

rename effect16 reps

rename effect17 bias

rename effect18 rmse

rename effect19 coverage

rename effect20 se

gen model = "prais"

save "C:\Users\Ariel\Desktop\ITSA_stuff\compare models\sens3_prais.dta", replace

**************************************

* combine data sets and generate graph

**************************************

use "C:\Users\Ariel\Desktop\ITSA_stuff\compare models\sens3_nw.dta", replace

append using "C:\Users\Ariel\Desktop\ITSA_stuff\compare models\sens3_prais.dta"

save "C:\Users\Ariel\Desktop\ITSA_stuff\compare models\sens3_combine.dta", replace

use "C:\Users\Ariel\Desktop\ITSA_stuff\compare models\sens3_combine.dta", replace

set scheme stmono2

local controls 12

twoway ///

(connected power period if model == "nw" & controls == `controls', sort) ///

(connected power period if model == "prais" & controls == `controls' , sort), ///

legend(order(1 "OLS-NW" 2 "PW") ///

title("Model", size(medium))) ///

xtitle("Period") ///

ytitle("Power(1-{&beta})") ///

ylabel(.2(.2)1)

graph save "Graph" "C:\Users\Ariel\Desktop\ITSA_stuff\compare models\sens3.gph", replace

***************************************

* single runs for Demo (figure 1 and 2)

***************************************

*********

* trend *

*********

* show DGP for trend (25%)

power_sim_multi_itsa, n(50) trp(25) contcnt(12) tint(10) cint(10) tpre(1) cpre(1) tstep(0) cstep(0) tsd(1) csd(1) cpost(1) tpost(1.25) tacorr(.20) cacorr(.20) alpha(0.05)

itsa y , treat(1) trperiod(25) fig(ylab(0(20)100) title("(A)") legend(off) note("") subtitle("")) replace posttrend

graph save "Graph" "C:\Users\Ariel\Desktop\ITSA_stuff\compare models\Demo_trend_.25_graph.gph"

* show DGP for trend (50%)

power_sim_multi_itsa, n(50) trp(25) contcnt(12) tint(10) cint(10) tpre(1) cpre(1) tstep(0) cstep(0) tsd(1) csd(1) cpost(1) tpost(1.50) tacorr(.20) cacorr(.20) alpha(0.05)

itsa y , treat(1) trperiod(25) fig(ylab(0(20)100) title("(B)") legend(off) note("") subtitle("")) replace posttrend

graph save "Graph" "C:\Users\Ariel\Desktop\ITSA_stuff\compare models\Demo_trend_.50_graph.gph"

* show DGP for trend (100%)

power_sim_multi_itsa, n(50) trp(25) contcnt(12) tint(10) cint(10) tpre(1) cpre(1) tstep(0) cstep(0) tsd(1) csd(1) cpost(1) tpost(2) tacorr(.20) cacorr(.20) alpha(0.05)

itsa y , treat(1) trperiod(25) fig(ylab(0(20)100) title("(C)") legend(off) note("") subtitle("")) replace posttrend

graph save "Graph" "C:\Users\Ariel\Desktop\ITSA_stuff\compare models\Demo_trend_1.0_graph.gph"

* combine graphs

gr combine "C:\Users\Ariel\Desktop\ITSA_stuff\compare models\Demo_trend_.25_graph.gph" ///

"C:\Users\Ariel\Desktop\ITSA_stuff\compare models\Demo_trend_.50_graph.gph" ///

"C:\Users\Ariel\Desktop\ITSA_stuff\compare models\Demo_trend_1.0_graph.gph", row(1) altshrink

graph save "Graph" "C:\Users\Ariel\Desktop\ITSA_stuff\compare models\Demo_trend_combined_graph.gph", replace

*********

* level *

*********

* show DGP for level (20%)

power_sim_multi_itsa, n(50) trp(25) contcnt(12) tint(10) cint(10) tpre(0) cpre(0) tstep(2) cstep(0) tsd(1) csd(1) cpost(0) tpost(0) tacorr(.20) cacorr(.20) alpha(0.05)

itsa y , treat(1) trperiod(25) fig(ylab(0(5)30) title("(A)") legend(off) note("") subtitle("")) replace posttrend

graph save "Graph" "C:\Users\Ariel\Desktop\ITSA_stuff\compare models\Demo_level_.20_graph.gph"

* show DGP for level (25%)

power_sim_multi_itsa, n(50) trp(25) contcnt(12) tint(10) cint(10) tpre(0) cpre(0) tstep(2.5) cstep(0) tsd(1) csd(1) cpost(0) tpost(0) tacorr(.20) cacorr(.20) alpha(0.05)

itsa y , treat(1) trperiod(25) fig(ylab(0(5)30) title("(B)") legend(off) note("") subtitle("")) replace posttrend

graph save "Graph" "C:\Users\Ariel\Desktop\ITSA_stuff\compare models\Demo_level_.25_graph.gph"

* show DGP for level (30%)

power_sim_multi_itsa, n(50) trp(25) contcnt(12) tint(10) cint(10) tpre(0) cpre(0) tstep(3) cstep(0) tsd(1) csd(1) cpost(0) tpost(0) tacorr(.20) cacorr(.20) alpha(0.05)

itsa y , treat(1) trperiod(25) fig(ylab(0(5)30) title("(C)") legend(off) note("") subtitle("")) replace posttrend

graph save "Graph" "C:\Users\Ariel\Desktop\ITSA_stuff\compare models\Demo_level_.30_graph.gph"

* combine graphs

gr combine "C:\Users\Ariel\Desktop\ITSA_stuff\compare models\Demo_level_.20_graph.gph" ///

"C:\Users\Ariel\Desktop\ITSA_stuff\compare models\Demo_level_.25_graph.gph" ///

"C:\Users\Ariel\Desktop\ITSA_stuff\compare models\Demo_level_.30_graph.gph", row(1) altshrink

graph save "Graph" "C:\Users\Ariel\Desktop\ITSA_stuff\compare models\Demo_level_combined_graph.gph", replace

**********************

* graph type 1 errors

**********************

* note: type 1 error were computed using -power_sim_multi_itsa- in a loop as power_itsa cannot compute type 1 errors

*** type 1 error over time ***

use "C:\Users\Ariel\Desktop\ITSA_stuff\compare models\type1error_time.dta", clear

set scheme stmono2

twoway ///

(connected type1 period if model == "nw", sort) ///

(connected type1 period if model == "prais", sort), ///

legend(order(1 "OLS-NW" 2 "PW") ///

title("Model", size(medium))) ///

xtitle("Period") ///

ytitle("Type I error rate") ///

ylabel(0(.10).50)

graph save "Graph" "C:\Users\Ariel\Desktop\ITSA_stuff\compare models\type1error_time.gph", replace

*** type 1 error over levels of autocorrelation ***

use "C:\Users\Ariel\Desktop\ITSA_stuff\compare models\type1error_ac_combined.dta", clear

set scheme stmono2

twoway ///

(connected type1 ac if model == "nw", sort) ///

(connected type1 ac if model == "prais", sort), ///

legend(order(1 "OLS-NW" 2 "PW") ///

title("Model", size(medium))) ///

xtitle("Autocorrelation") ///

ytitle("Type I error rate") ///

ylabel(0(.10).60) ///

xlabel(-.90(.30)0.90, format(%4.2f))

graph save "Graph" "C:\Users\Ariel\Desktop\ITSA_stuff\compare models\type1error_ac.gph"
